# Supplementary material for: Two-dimensional hierarchically porous carbon nanosheets for flexible aqueous supercapacitors with high volumetric capacitance
Source: Royal Society of Chemistry journal article supplement (doi:10.1039/c9nr02476j), 2019-01-01
Supplement: c9nr02476j1.pdf [file c9nr02476j1.pdf]

Supporting information

**Two-dimensional hierarchical porous carbon nanosheets for high  
volumetric-capacitance flexible aqueous supercapacitors**

*Lei Yao<sup>\*</sup>, Junsheng Lin, Haitao Yang<sup>\*</sup>, Qin Wu, Dongrui Wang, Xiujuan Li, Libo Deng and  
Zijian Zheng<sup>\*</sup>*

Prof. L. Yao, Prof. Yang and X. Li

College of Materials Science and Engineering, Shenzhen University, Shenzhen, Guangdong  
518060, P. R. China

E-mail: lyao@szu.edu.cn

J. Lin, Q. Wu and Prof. L. Deng

College of Chemistry and Environmental Engineering, Shenzhen University, Shenzhen,  
Guangdong 518060, P. R. China

Prof. Z. Zheng

Laboratory for Advanced Interfacial Materials and Devices, Institute of Textiles and Clothing,  
The Hong Kong Polytechnic University, Hong Kong SAR, China

E-mail: tczzheng@polyu.edu.hk

Prof. D. Wang

School of Chemistry and Biological Engineering, University of Science and  
Technology Beijing, Beijing, China

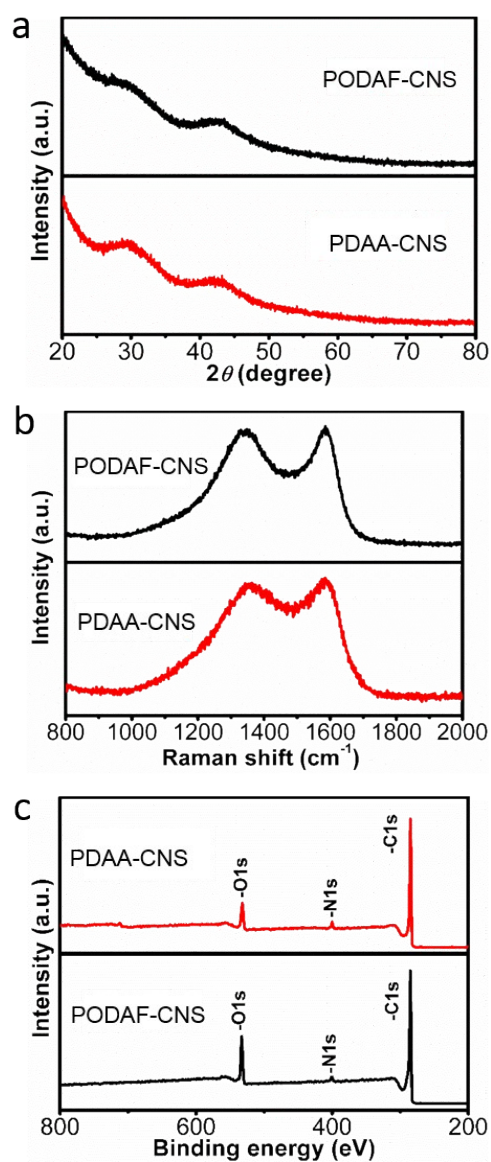

**Fig. S1** Structural characterization of PDAA-CNS and PODAF-CNS. a) XRD spectra. b) Raman spectra. c) XPS spectra.

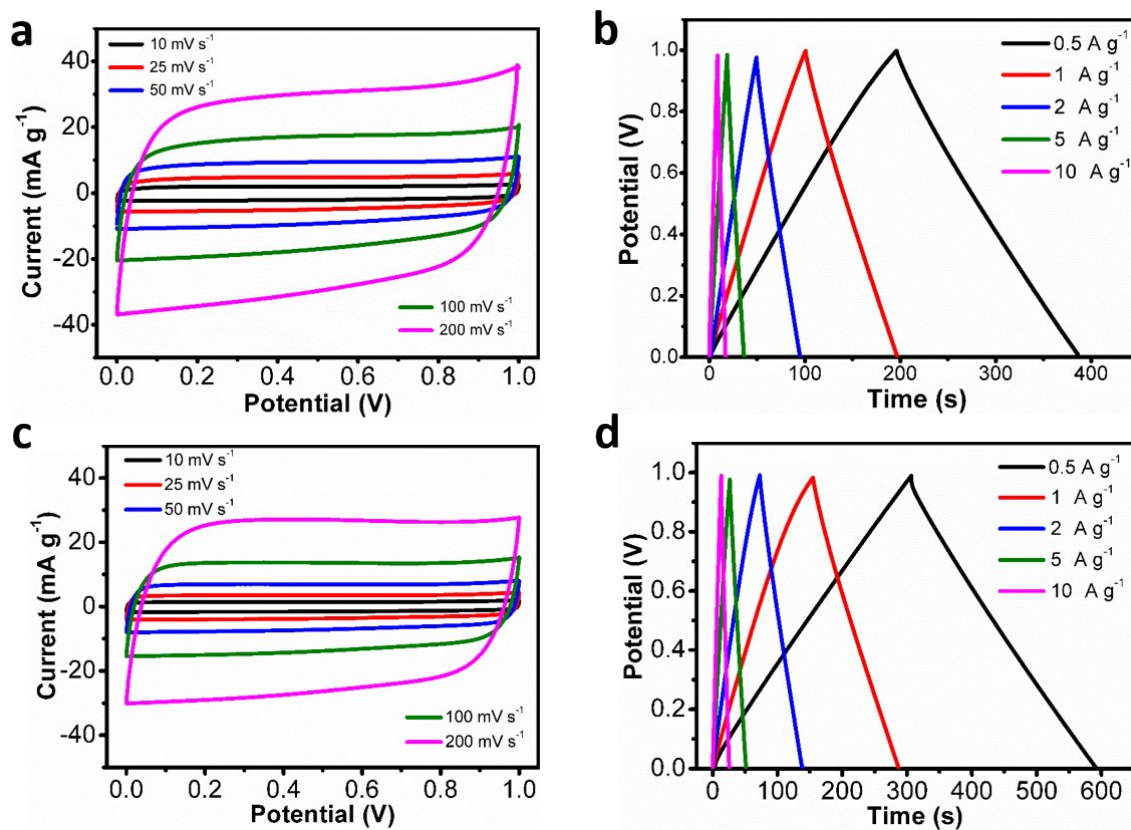

**Fig. S2** Electrochemical properties of the symmetric coin-type supercapacitors using (a, b) PODAF-CNS and (c, d) PDAA-CNS as the electrode material and 6 M KOH electrolyte. a, c) CV curves measured at different scanning rates. b, d) GCD curves measured at different current densities.
